# Supplementary material
Source: Springer Nature journal article supplement (https://www.springermedizin.de/resource/supplementary/12874_2011_822_MOESM5_ESM.pdf/9432696)
Supplement: MOESM5 [file 9432696]

Eligible for follow-up (n=208)

Unable to contact for follow-up (n=44)

Contacted to participate in follow-up (n=164)

Contacted, but lost to follow-up (n=39).  
Reasons for non-participation: Withdrew n=17; Relocated n=12;  
Redeployed n=9; Deceased n=1

Final sample size for follow-up cohort visit 2 (n=135)
